# Supplementary material for: Hydrothermal synthesis and structural characterisation of [H2DABCO]3[Cu16Cl22]: a new copper(i) chloride framework
Source: Royal Society of Chemistry journal article supplement (doi:10.1039/c2ce26068a), 2012-10-19

# Hydrothermal synthesis and structural characterisation of [H<sub>2</sub>DABCO]<sub>3</sub>[Cu<sub>16</sub>Cl<sub>22</sub>]: a new copper(I) chloride framework

Edward R. Williams and Mark T. Weller\*

## Electronic Supplementary Information

X-ray diffraction powder pattern (CuK<sub>α1</sub> radiation) for [H<sub>2</sub>DABCO]<sub>3</sub>[Cu<sub>16</sub>Cl<sub>22</sub>], showing the alignment of the major peaks, for example at ~15 ° (Predicted pattern in blue, collected pattern in green).

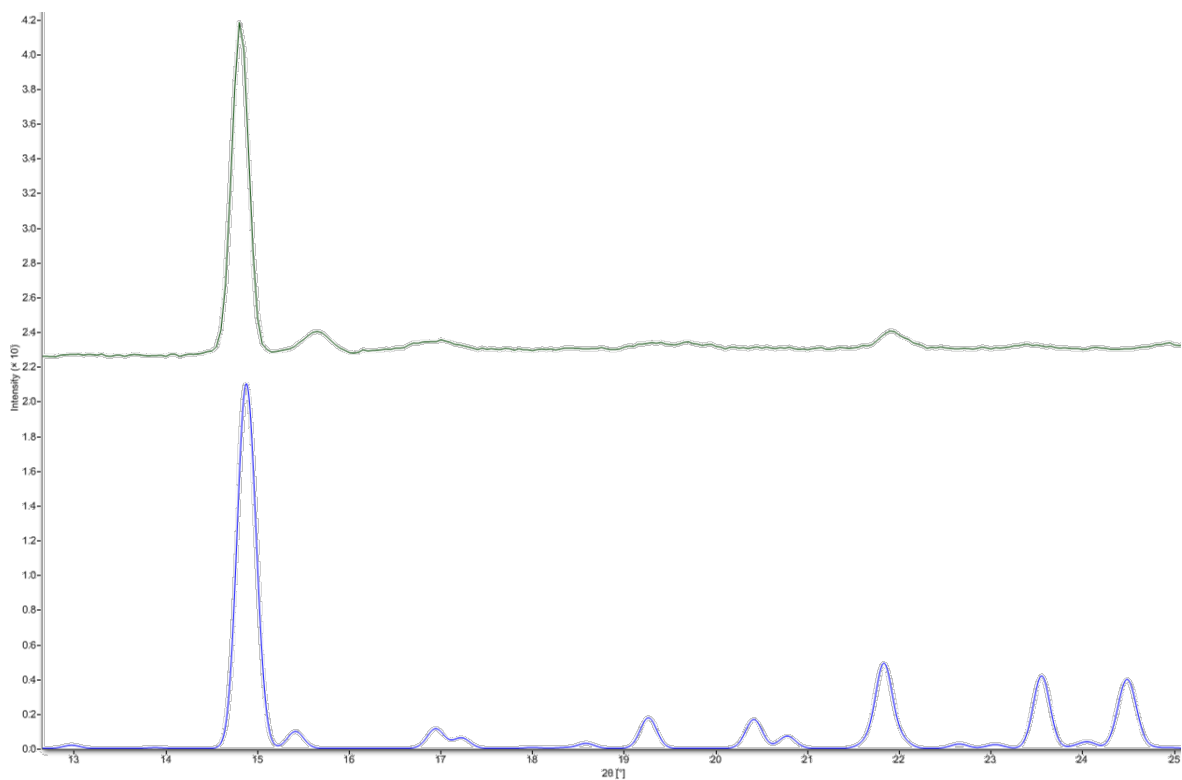

Supplement: c2ce26068a.pdf [file c2ce26068a.pdf]
